# Supplementary material
Source: PubMed Central journal article supplement (PMC3025051)
Supplement: NIHMS260190-supplement-Supplemental_data.pdf [file NIHMS260190-supplement-Supplemental_data.pdf]

**Fig S1.**

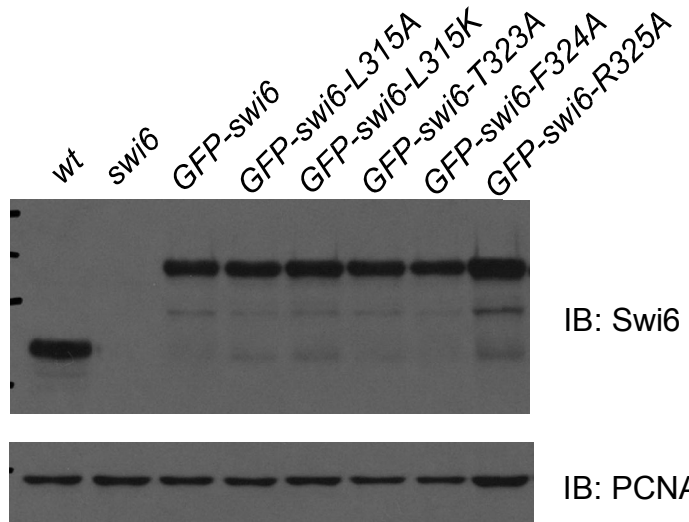

**Fig S1: Protein expression of GFP-Swi6 constructs is similar to endogenous Swi6 determined by western blot.** Mid-log phase cells were grown in EMM medium and protein lysates were prepared. 1:5000 dilution of antibody to endogenous Swi6<sup>37</sup> was used. PCNA was detected as the loading control.

**Fig S2.**

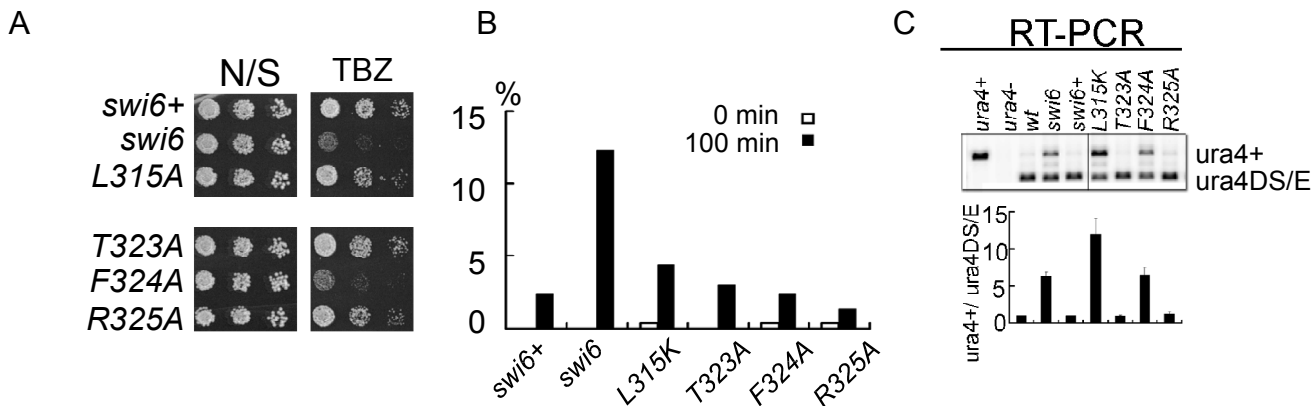

**Fig S2: Chromosome segregation phenotypes of the *swi6* mutants.** (A) TBZ sensitivity of mutants was measured by serial dilution on 17  $\mu$ M TBZ in EMM medium. (B) Quantitation of lagging chromosomes. Cells were arrested in 15 mM hydroxyurea at 32°C for 4 hours and released into the cell cycle. At 100 min, the fraction of cells with >2 DAPI staining bodies was determined. 100 cells were counted in two independent experiments; the average is presented. (C) *ura4+* expression in *cen1L(dh)* measured using RT-PCR. Signals were normalized to expression of the *ura4-DS/E* minigene at the normal (euchromatic) locus.

Fig S3.

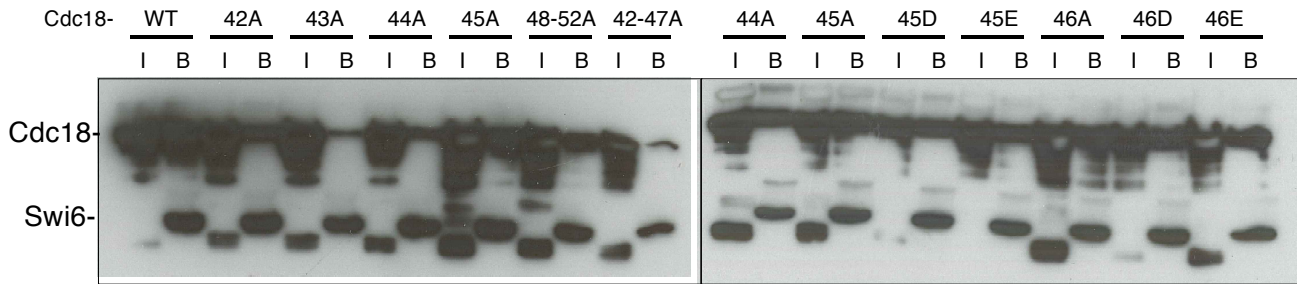

**Fig S3: analysis of additional *cdc18* mutations.** *In vitro* binding studies were performed as in Fig 4B, by immunoprecipitation of recombinant MBP-Myc Cdc18 wild-type or fragments or mutants in presence of bacterially produced recombinant His6FLAG-Swi6 wild-type on FLAG M2-agarose conjugate beads. Cdc18 binding was measured by western blotting. Immunoblotting was performed with anti-Myc antibodies for *cdc18* or anti-FLAG antibodies for Swi6. I input; B beads.

Fig S4

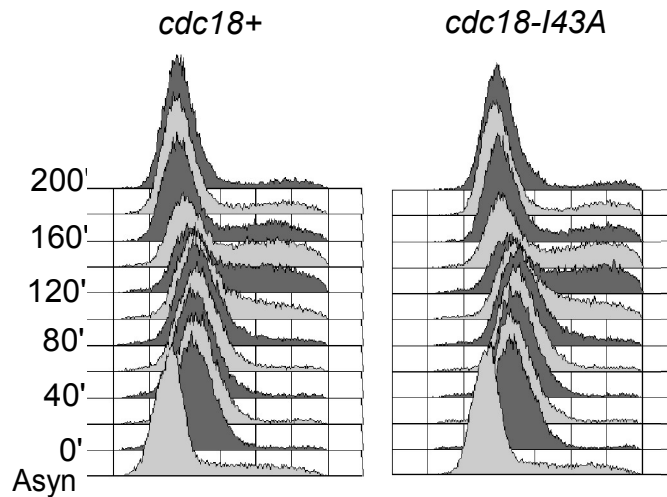

**Fig S4: Cell cycle progression of *cdc18*<sup>+</sup> and *cdc18-I43A* determined by flow cytometry.** Cells were synchronized at G2 by *cdc25-22* shifting to 36°C for 4 hours and released at 25°C. Samples were collected every 20 min for 200 min and fixed in 70% ethanol.

Fig S5

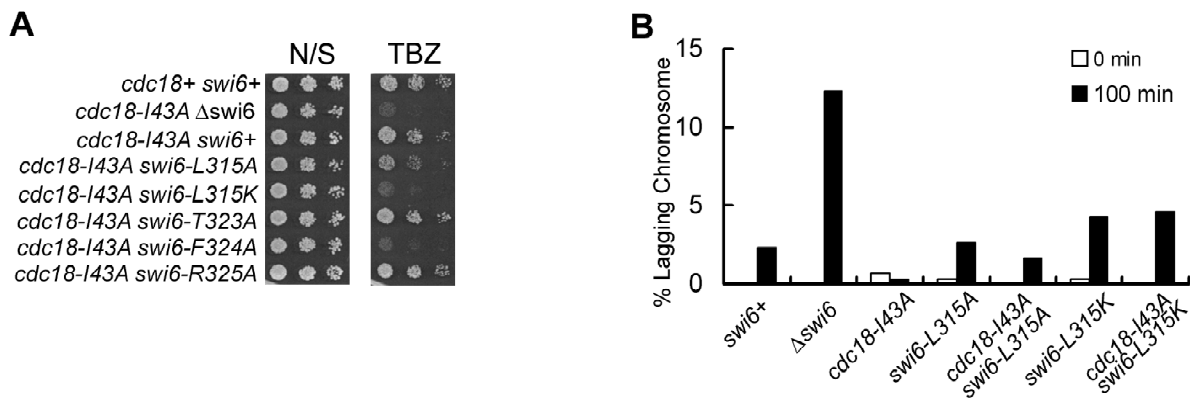

**Fig S5: The phenotype of *cdc18-I43A* and *swi6* double mutants.** (A) Centromere integrity and gene silencing were assayed by TBZ sensitivity, and cell viability on FOA medium. (B) Lagging chromosomes determined as Fig S2.

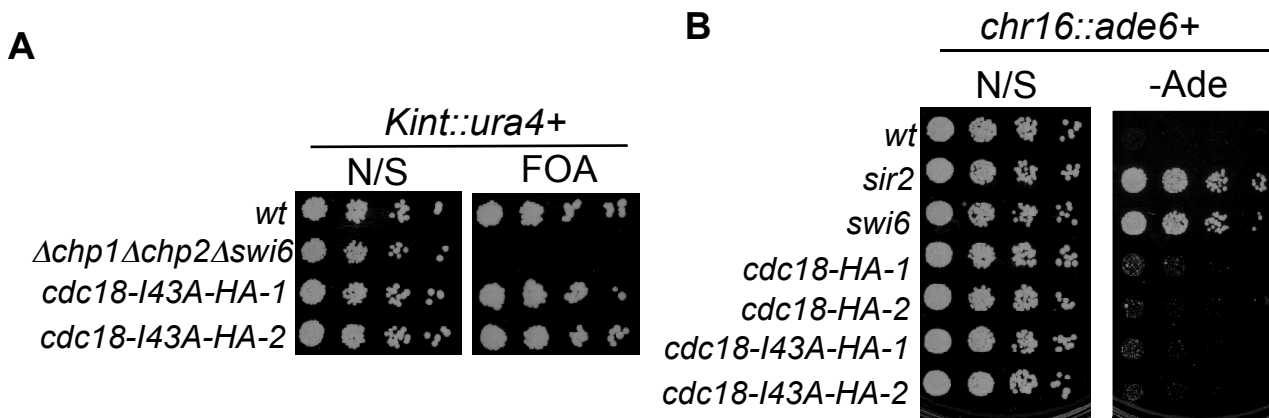

**Fig S6: Gene silencing of *cdc18-I43A* at different regions** was tested using a *ura4<sup>T</sup>* transgene at the mating locus (A), telomere (B). Normal silencing results in viability on FOA medium or Ade minus medium.

Table S1. Strains list

| Number | Genotype                                                                                                                   |                |
|--------|----------------------------------------------------------------------------------------------------------------------------|----------------|
| 254    | h- can1-1 leu1-32 ade6-M210 ura4-D18                                                                                       |                |
| 2228   | h- Δswi6::his1+ otr1L(dh/HindIII)::ura4+ ade6-M210 leu1-32 ura4-DS/E his1-102                                              | 1              |
| 3386   | h- Δswi6::his1+ otr1L(dh/HindIII)::ura4+ ade6-M210 leu1-32::[leu1+ nmt 81-GFP-swi6] ura4-DS/E his1-102                     | This Study     |
| 3387   | h- Δswi6::his1+ otr1L(dh/HindIII)::ura4+ ade6-M210 leu1-32::[leu1+ nmt 81-GFP-swi6-L315A] ura4-DS/E his1-102               | This Study     |
| 3388   | h- Δswi6::his1+ otr1L(dh/HindIII)::ura4+ ade6-M210 leu1-32::[leu1+ nmt 81-GFP-swi6-L315K] ura4-DS/E his1-102               | This Study     |
| 3389   | h- Δswi6::his1+ otr1L(dh/HindIII)::ura4+ ade6-M210 leu1-32::[leu1+ nmt 81-GFP-swi6-T323A] ura4-DS/E his1-102               | This Study     |
| 3390   | h- Δswi6::his1+ otr1L(dh/HindIII)::ura4+ ade6-M210 leu1-32::[leu1+ nmt 81-GFP-swi6-F324A] ura4-DS/E his1-102               | This Study     |
| 3391   | h- Δswi6::his1+ otr1L(dh/HindIII)::ura4+ ade6-M210 leu1-32::[leu1+ nmt 81-GFP-swi6-R325A] ura4-DS/E his1-102               | This Study     |
| 3716   | h- cdc18-I43A-HA Δswi6::his1+ otr1L(dh/HindIII)::ura4+ ade6-M210 leu1-32::[leu1+ nmt 81-GFP-swi6] ura4-DS/E his1-102       | This Study     |
| 3717   | h- cdc18-I43A-HA Δswi6::his1+ otr1L(dh/HindIII)::ura4+ ade6-M210 leu1-32::[leu1+ nmt 81-GFP-swi6-L315A] ura4-DS/E his1-102 | This Study     |
| 3718   | h- cdc18-I43A-HA Δswi6::his1+ otr1L(dh/HindIII)::ura4+ ade6-M210 leu1-32::[leu1+ nmt 81-GFP-swi6-L315K] ura4-DS/E his1-102 | This Study     |
| 3719   | h- cdc18-I43A-HA Δswi6::his1+ otr1L(dh/HindIII)::ura4+ ade6-M210 leu1-32::[leu1+ nmt 81-GFP-swi6-T323A] ura4-DS/E his1-102 | This Study     |
| 3720   | h- cdc18-I43A-HA Δswi6::his1+ otr1L(dh/HindIII)::ura4+ ade6-M210 leu1-32::[leu1+ nmt 81-GFP-swi6-F324A] ura4-DS/E his1-102 | This Study     |
| 3721   | h- cdc18-I43A-HA Δswi6::his1+ otr1L(dh/HindIII)::ura4+ ade6-M210 leu1-32::[leu1+ nmt 81-GFP-swi6-R325A] ura4-DS/E his1-102 | This Study     |
| 3722   | h- cdc18-I43A-HA Δswi6::his1+ otr1L(dh/HindIII)::ura4+ ade6-M210 leu1-32::[leu1+ nmt 81-GFP] ura4-DS/E his1-102            | This Study     |
| 2221   | h+ swi6::his1 ade6-210 his1-102 leu1-32 ura4-DS/E otr1R (dg-glu) Sph1::ade6+                                               | Robin Allshire |
| 4008   | h+ cdc18::cdc18-HA ade6ΔN/N otr1R (dg-glu) Sph1:: ade6+ leu1                                                               | This Study     |
| 4009   | h- cdc18::cdc18-I43A-HA ade6ΔN/N otr1R (dg-glu) Sph1:: ade6+ leu1-32(PCL061209)                                            | This Study     |
| 3324   | h+ ort1L(dh/HindIII)::ura4+ leu1-32 ura4ΔS/E ade6ΔN/N [ch16 M23::LEU2+ tel::ade6+]                                         | This Study     |
| 3384   | h90 Δsir2::KanMX6 cent::ura4+ leu1-32 ura4dS/E ade6dN/N [ch16 LEU2 tel::ade6+]                                             | This Study     |
| 3385   | h+ Δswi6::his1+ cent::ura4+ leu1-32 his1-102? ura4dS/E ade6dN/N ch16[LEU2 tel::ade6+]                                      | This Study     |
| 3709   | h+ cdc18-HA ura4DS/E otr1L::ura4+ ade6ΔN/N [ch16 M23::LEU2+ tel::ade6+]                                                    | This Study     |
| 3710   | h- cdc18-I43A-HA ura4DS/E otr1L::ura4+ ade6ΔN/N [ch16 M23::LEU2+ tel::ade6+]                                               | This Study     |
| 3472   | h90 ade6-M216 his2 leu1-32 ura4DS/E Kint::ura4+ chp2+-13myc-kanMX6                                                         | 2              |
| 3474   | h90 ade6-M216 his2 leu1-32 ura4DS/E Kint2::ura4+ Dchp1::kanMX6 Dchp2::kanMX6 Dswi6::kanMX6                                 | 2              |
| 3723   | h? cdc18-I43A-HA chp2-myc-kan uraDS/E kint::ura4+ leu1-32 ade?                                                             | This Study     |
| 3898   | h+ leu1-32 ade6-M216 ura4DS/E imr1R::ura4+ ori1 chp1::TAP-kan <sup>R</sup> Δdcr1::nat <sup>R</sup>                         | 3              |
| 4010   | h- cdc18::cdc18-HA imr1L(NcoI)::ura4+ ade6-M210 leu1-32 ura4-DS/E (PCL061209)                                              | This Study     |
| 4011   | h- cdc18::cdc18-I43A-HA imr1L(NcoI)::ura4+ ade6-M210 leu1-32 ura4-DS/E (PCL061209)                                         | This Study     |
| 4233   | h+ cdc25-22 cdc18::cdc18-HA leu1-32 ura4-D18 ade6-M210                                                                     | This Study     |
| 4234   | h- cdc25-22 cdc18::cdc18-I43A-HA leu1-32 ura4-D18 ade6-M210                                                                | This Study     |
| 4359   | h- cdc18::cdc18-I43A-HA otr2 K <sup>n</sup> HindIII::ura4 orill ade6-M210 leu1-32 ura4-DS/E                                | This Study     |
| 4360   | h- cdc18::cdc18-I43A-HA otr2 K <sup>n</sup> HindIII::ura4 orill ade6-M210 leu1-32 ura4-DS/E                                | This Study     |
| 4361   | h- cdc18::cdc18-HA otr3 K <sup>n</sup> HindIII::ura4 ori1 ade6-M210 leu1-32 ura4-DS/E                                      | This Study     |
| 4362   | h+ Δswi6::kanMX otr2 K <sup>n</sup> HindIII::ura4 ori1 ade6-M210 leu1-32 ura4-DS/E                                         | This Study     |
| 4413   | h+ Δswi6::kanMX otr3 K <sup>n</sup> HindIII::ura4 ori1 ade6-M210 leu1-32 ura4-DS/E                                         | This Study     |
| 4414   | h+ cdc18::cdc18-I43A-HA otr3 K <sup>n</sup> HindIII::ura4 ori1 ade6-M210 leu1-32 ura4-DS/E                                 | This Study     |
| 2318   | h+ cdc10-V50 leu1-32::hENT1-leu1+(pJAH29) his7-366::hsv-tk-his7+(pJAH31) ade6-M216 ura4-D18                                | This Study     |

|             |                                                                                                                  |            |
|-------------|------------------------------------------------------------------------------------------------------------------|------------|
| <b>3812</b> | h+ cdc10-V50 Dswi6::ura4+ leu1-32::hENT1-leu1+(pJAH29) his7-366::hsv-tk-his7+(pJAH31) ade6-M216 ura4-D18         | This Study |
| <b>3813</b> | h+ cdc10-V50 cdc18::cdc18-I43A-HA leu1-32::hENT1-leu1+(pJAH29) his7-366::hsv-tk-his7+(pJAH31) ade6-M216 ura4-D18 | This Study |
| <b>4354</b> | h- otr1Ldh(HindIII)::ura4+ leu1::hENT-Leu1+ his7-366::hsv-tk-his7+ ura4DS/E ade6-M210                            | This Study |
| <b>4355</b> | h+ cdc18::cdc18-I43A-HA otr1Ldh(HindIII)::ura4+ leu1::hENT-Leu1+ his7-366::hsv-tk-his7+ ura4DS/E ade6-M210       | This Study |
| <b>4356</b> | h90 Δswi6::kanMX otr1Ldh(HindIII)::ura4+ leu1::hENT-Leu1+ his7-366::hsv-tk-his7+ ura4DS/E ade6-M210              | This Study |

Table S2. Primers list

| <b>Genes</b>            | <b>No.</b> | <b>Sequence</b>         |
|-------------------------|------------|-------------------------|
| <b><i>dh-F</i></b>      | 1033       | GTAAGTATGAGCAACTGGCG    |
| <b><i>dh-R</i></b>      | 1034       | GGAACAAATCAGGAAACCGAG   |
| <b><i>dg-F</i></b>      | 1041       | TTTTCAGCGAGACATGTACC    |
| <b><i>dg-R</i></b>      | 1042       | TCATAAAGCAACACTGGGTG    |
| <b><i>cnt-F</i></b>     | 978        | AGTTAAGCGGTATTATCACG    |
| <b><i>cnt-R</i></b>     | 979        | GAATTGACATATACTCTGTC    |
| <b><i>ura4-F</i></b>    | 796        | GAGGGGATGAAAAATCCCAT    |
| <b><i>ura4-R</i></b>    | 797        | TTCGACAACAGGATTACGACC   |
| <b><i>act1-F</i></b>    | 1315       | GAG TCC AAGACGATACCAGTG |
| <b><i>act1-R</i></b>    | 1316       | GGCATCACACTTTCTACAACG   |
| <b><i>imr1-F</i></b>    | 1039       | CACATACCAAAAAAGTCTGG    |
| <b><i>imr1-R</i></b>    | 1040       | GCTGAGGCTAAGTATCTGTT    |
| <b><i>ars2004-F</i></b> | 1374       | ATGGTAGATGGAGAAACGGG    |
| <b><i>ars2004-R</i></b> | 1375       | CACGGCATCTTTCTTCACGA    |
| <b><i>Non-ars-F</i></b> | 1376       | TCGAAGATCCTACCGCTTTC    |
| <b><i>Non-ars-R</i></b> | 1377       | GATTCACATAACCCGCTAGC    |

1. Bailis JM, Bernard P, Antonelli R, Allshire RC, Forsburg SL. Hsk1-Dfp1 is required for heterochromatin-mediated cohesion at centromeres. *Nature Cell Biology* 2003; 5:1111-6.
2. Sadaie M, Iida T, Urano T, Nakayama J. A chromodomain protein, Chp1, is required for the establishment of heterochromatin in fission yeast. *EMBO J* 2004; 23:3825-35.
3. Motamedi MR, Verdell A, Colmenares SU, Gerber SA, Gygi SP, Moazed D. Two RNAi complexes, RITS and RDRC, physically interact and localize to noncoding centromeric RNAs. *Cell* 2004; 119:789-802.
